# Supplementary material
Source: Springer Nature journal article supplement (https://www.springermedizin.de/resource/supplementary/12967_2014_1819_MOESM2_ESM.pdf/9575310)
Supplement: MOESM2 [file 9575310]

**A)**

```

10 20 30 40 50 60 70
RefY11604 MSINPKPKQKTKNTNRRPDMVKGPPGGGIVGVLLPFRGRFLGVATRTKTSERASDQPRRRDPIKARR
R67 4a .....
R115 4a .....
R391 4a .....
R424 4a .....
R513 4a .....N.....
R676 4a .....
R730 4a .....
R766 4a .....H..E...
R829 4a .....
R857 4a .....
R906 4a .....
R1043 4a .....
R1071 4a .....Q.....
R1245 4a .....
R_261_4a .....R.....777_4a .....
R_264_4a .....
R_864_4a .....M.....
R_1035_4a .....
R_1359_4a .....
R_1504_4a .....
R_1549_4a .....
R_IP-6_4a .....S..R.....T.....E.....
R_IP-19_4a .....Q.....E.....
R_IP-19_4d .....S.....
R_IP-18_4d .....
R_IP-19_4a .....Q.....A.....E.....
R_IP-21_4a .....S.....
R_IP-35_4a .....
R_IP-86_4a .....
R_IP-87_4a .....
R_IP-88_4a .....Q.....
R_IP-89_4a .....
R_IP-92_4a .....N.....
R_IP-93_4a .....
R_IP-94_4a .....
R_IP-103_4a .....
R_IP-105_4a .....Q.....
R_IP-106_4a .....
R_IP-107_4a .....

```

```

80 90 100 110 120 130 140
RefY11604 PRSRWAGPCFPLFLGKCCGACMLLPSGSPFSGWDRGRSRRLGKVIDTLGCGADMVITLV
R67 4a .....R.....
R116 4a .....R.....
R391 4a .....R.....
R424 4a .....R.....I.....
R513 4a .....R.....V.....
R676 4a .....R.....
R676 4a .....R.....
R730 4a .....R.....I.....
R766 4a .....S.....I.....
R829 4a .....R.....
R857 4a .....R.....
R906 4a .....R.....
R1043 4a .....R.....
R1071 4a .....R.....S.....
R1245 4a .....R.....S.....
R_261_4a .....R.....I.....
R_777_4a .....R.....
R_824_4a .....R.....V.....
R_864_4a .....R.....L.....I.....
R_1035_4a .....S.....RK.....
R_1359_4a .....R.....S.....
R_1504_4a .....S.....
R_1549_4a .....S.....
R_IP-6_4a .....S.....K..G..A.....T.....R.....L..V..V.V.
R_IP-19_4a .....S.....K..G..A.....T.....R.....L..V..V.V.
R_IP-19_4d .....S.....K..G..A.....T.....R.....L..V..V.V.
R_IP-19_4a .....S.....K..G..A.....T.....R.....L..V..V.V.
R_IP-21_4a .....S.....Q.....A.....V.....
R_IP-21_4d .....S.....Q.....A.....V.....
R_IP-35_4a .....S.....Q.....A.....V.....
R_IP-87_4a .....S.....Q.....A.....V.....
R_IP-88_4a .....S.....Q.....A.....V.....
R_IP-89_4a .....S.....Q.....A.....V.....
R_IP-92_4a .....S.....Q.....A.....V.....
R_IP-93_4a .....S.....Q.....A.....V.....
R_IP-96_4a .....S.....Q.....A.....V.....
R_IP-103_4a .....S.....R.....
R_IP-105_4a .....S.....R.....
R_IP-106_4a .....S.....R.....
R_IP-107_4a .....S.....R.....

```

```

150 160 170 180 190
RefY11604 GAPVGSVARALAHGVRLDEDGINVATGNLPCGSPSIFLLALLSCLTVPSAA
R67 4a .....G.....I..V.....
R116 4a .....G.....I..V.....
R391 4a .....G.....V.....
R424 4a .....G.....V.....
R513 4a .....G.....V.....
R676 4a .....G.....V.....
R676 4a .....G.....V.....
R730 4a .....G.....V.....
R766 4a .....G.....V..L.....T.....
R829 4a .....G.....V.....
R857 4a .....G.....V.....
R906 4a .....G.....V.....
R1043 4a .....G.....L..V.....
R1071 4a .....G.....V.....
R1245 4a .....G.....V.....
R_261_4a .....G.....V.....
R_777_4a .....G.....V.....
R_824_4a .....G.....V.....
R_864_4a .....G.....V.....
R_1035_4a .....G.....V.....
R_1359_4a .....G.....V.....
R_1504_4a .....G.....V.....
R_1549_4a .....G.....V.....
R_IP-6_4a .....G.....V.....G.A.CIIV.....F.....I.....P.....
R_IP-19_4a .....G.....V.....
R_IP-19_4d .....G.....V.....L..V.....
R_IP-19_4a .....G.A.CIIV.....V.....F.....I.....P.....
R_IP-21_4a .....G.....V.....
R_IP-21_4d .....G.....V.....
R_IP-35_4a .....G.....V.....
R_IP-86_4a .....G.....V.....T.....
R_IP-87_4a .....G.....V.....
R_IP-88_4a .....G.....V.....
R_IP-89_4a .....G.....V.....
R_IP-92_4a .....G.....V.....
R_IP-93_4a .....G.....V.....
R_IP-96_4a .....G.....V.....
R_IP-103_4a .....G.....V..V.....
R_IP-105_4a .....G.....V.....
R_IP-106_4a .....G.....V.....
R_IP-107_4a .....G.....V.....

```

**B)**

```

10 20 30 40 50 60 70
RefY11604 MSINPKPKQKTKNTNRRPDMVKGPPGGGIVGVLLPFRGRFLGVATRTKTSERASDQPRRRDPIKARR
R67 4a .....R.....E.....
NR301 4a .....Q.....
NR407 4a .....C.....
NR489 4a .....
NR545 4a .....
NR564 4a .....
NR610 4a .....M.....
NR731 4a .....
NR752 4a .....E.....
NR839 4a .....E.....
NR905 4a .....S.....
NR937 4a .....I.....
NR952 4a .....I.....
NR1015 4a .....E.....
NR1027 4a .....
NR1034 4a .....
NR1056 4a .....
NR1157 4a .....
NR1176 4a .....
NR1200 4a .....
NR1248 4a .....Q.....
NR1267 4a .....E.....
NR1292 4a .....
NR1301 4a .....Q.....
NR1478 4a .....M.....H..E...
NR1567 4a .....Q.....
NR1775 4a .....

```

```

80 90 100 110 120 130 140
RefY11604 PEGSRWAGPCFPLFLGKCCGACMLLPSGSPFSGWDRGRSRRLGKVIDTLGCGADMVITLV
R116 4a .....R.....
NR301 4a .....R.....L.....
NR407 4a .....R.....
NR489 4a .....S.....
NR545 4a .....R.....
NR564 4a .....R.....
NR610 4a .....S.....V.....
NR731 4a .....S.....
NR752 4a .....R.....L.....
NR839 4a .....S.....F.....
NR905 4a .....S.....R.....
NR937 4a .....S.....R.....
NR952 4a .....S.....R.....
NR1015 4a .....S.....A.....
NR1027 4a .....S.....
NR1034 4a .....S.....
NR1056 4a .....S.....R.....
NR1157 4a .....S.....
NR1176 4a .....S.....K.....V.....
NR1200 4a .....S.....R.....
NR1248 4a .....S.....A.....L.....T.....
NR1267 4a .....S.....A.....L.....T.....I.....
NR1292 4a .....S.....R.....
NR1301 4a .....S.....R.....
NR1478 4a .....S.....R.....
NR1567 4a .....S.....K..A.....
NR1689 4a .....S.....
NR1775 4a .....S.....R.....

```

```

150 160 170 180 190
RefY11604 GAPVGSVARALAHGVRLDEDGINVATGNLPCGSPSIFLLALLSCLTVPSAA
NR116 4a .....G.....V.....
NR301 4a .....G.....V.....
NR407 4a .....G.....V.....
NR489 4a .....G.....V.....
NR545 4a .....G.....V.....
NR564 4a .....G.....V.....
NR610 4a .....G.....V.....I.....
NR731 4a .....G.....V.....
NR752 4a .....G.....V.....
NR839 4a .....G.....V.....
NR905 4a .....G.....V.....T.....
NR937 4a .....G.....V.....
NR952 4a .....G.....V.....
NR1015 4a .....G.....V.....
NR1027 4a .....G.....V.....
NR1034 4a .....G.....V.....
NR1056 4a .....G.....V.....
NR1157 4a .....G.....V.....
NR1176 4a .....G.....V.....T.....
NR1200 4a .....G.....V.....
NR1248 4a .....G.L.A.....V..V.....I.....
NR1267 4a .....G.....V..V.....
NR1292 4a .....G.....V.....
NR1301 4a .....G.....V.....
NR1478 4a .....G.....V.....
NR1567 4a .....G.....V.....I..W.....
NR1689 4a .....G.....V.....
NR1775 4a .....G.....V.....

```

```

200 210 220 230 240
RefY11604 MSINPKPKQKTKNTNRRPDMVKGPPGGGIVGVLLPFRGRFLGVATRTKTSERASDQPRRRDPIKARR
R67 4a .....
R116 4a .....
R391 4a .....
R424 4a .....
R513 4a .....
R676 4a .....
R676 4a .....
R730 4a .....
R766 4a .....
R829 4a .....
R857 4a .....
R906 4a .....
R1043 4a .....
R1071 4a .....
R1245 4a .....
R_261_4a .....
R_777_4a .....
R_824_4a .....
R_864_4a .....
R_1035_4a .....
R_1359_4a .....
R_1504_4a .....
R_1549_4a .....
R_IP-6_4a .....
R_IP-19_4a .....
R_IP-19_4d .....
R_IP-19_4a .....
R_IP-21_4a .....
R_IP-21_4d .....
R_IP-35_4a .....
R_IP-86_4a .....
R_IP-87_4a .....
R_IP-88_4a .....
R_IP-89_4a .....
R_IP-92_4a .....
R_IP-93_4a .....
R_IP-96_4a .....
R_IP-103_4a .....
R_IP-105_4a .....
R_IP-106_4a .....
R_IP-107_4a .....

```
